# Supplementary material for: ULK2 Is a Key Pro-Autophagy Protein That Contributes to the High Chemoresistance and Disease Relapse in FLT3-Mutated Acute Myeloid Leukemia
Source: MDPI journal article supplement (doi:10.3390/ijms25010646), 2024-01-04
Supplement: s1 [file s1]

| SORE6 <sup>+</sup> /SORE6 <sup>-</sup><br>No Ara-C |                                 | SORE6 <sup>+</sup> /SORE6 <sup>-</sup><br>With 10 nM Ara-C |                                 |
|----------------------------------------------------|---------------------------------|------------------------------------------------------------|---------------------------------|
| Gene                                               | Fold Up- or Down-<br>Regulation | Gene                                                       | Fold Up- or Down-<br>Regulation |
| <i>ESR1</i>                                        | 10.90                           | <i>ULK2</i>                                                | 13.90                           |
| <i>FAS</i>                                         | 9.19                            | <i>INS</i>                                                 | 9.03                            |
| <i>PTEN</i>                                        | 9.08                            | <i>SNCA</i>                                                | 8.37                            |
| <i>SNCA</i>                                        | 8.55                            | <i>IFNG</i>                                                | 7.89                            |
| <i>MAPK14</i>                                      | 8.47                            | <i>APP</i>                                                 | 7.61                            |
| <i>APP</i>                                         | 8.07                            | <i>TMEM74</i>                                              | 7.20                            |
| <i>IFNG</i>                                        | 7.26                            | <i>DAPK1</i>                                               | 5.03                            |
| <i>CTSS</i>                                        | 6.83                            | <i>TGM2</i>                                                | 4.37                            |
| <i>ATG10</i>                                       | 6.79                            | <i>IGF1</i>                                                | 3.42                            |
| <i>BNIP3</i>                                       | 6.76                            | <i>ESR1</i>                                                | 3.41                            |
| <i>MAP1LC3B</i>                                    | 6.73                            | <i>ATG9B</i>                                               | 3.15                            |
| <i>TMEM74</i>                                      | 6.65                            | <i>BNIP3</i>                                               | 2.51                            |
| <i>AKT1</i>                                        | 6.62                            | <i>CTSS</i>                                                | 2.44                            |
| <i>DAPK1</i>                                       | 6.26                            | <i>MAP1LC3A</i>                                            | 2.25                            |
| <i>ULK2</i>                                        | 5.67                            | <i>ATG10</i>                                               | 2.15                            |
| <i>INS</i>                                         | 5.09                            | <i>RAB24</i>                                               | 2.14                            |
| <i>TGM2</i>                                        | 5.04                            | <i>PIK3R4</i>                                              | 1.99                            |
| <i>CDKN2A</i>                                      | 4.60                            | <i>BAK1</i>                                                | 1.87                            |
| <i>RAB24</i>                                       | 4.19                            | <i>HTT</i>                                                 | 1.76                            |
| <i>ATG9B</i>                                       | 4.01                            | <i>ATG16L2</i>                                             | 1.69                            |
| <i>CTSB</i>                                        | 3.90                            | <i>CTSD</i>                                                | 1.68                            |
| <i>MTOR</i>                                        | 3.76                            | <i>SQSTM1</i>                                              | 1.67                            |
| <i>GABARAPL2</i>                                   | 3.51                            | <i>NFKB1</i>                                               | 1.60                            |
| <i>MAP1LC3A</i>                                    | 3.28                            | <i>HSPA8</i>                                               | 1.56                            |
| <i>BAK1</i>                                        | 3.26                            | <i>EIF4G1</i>                                              | 1.55                            |
| <i>PIK3R4</i>                                      | 3.10                            | <i>GABARAPL1</i>                                           | 1.51                            |
| <i>MAPK8</i>                                       | 3.02                            | <i>DRAM1</i>                                               | 1.48                            |
| <i>ATG7</i>                                        | 2.89                            | <i>AMBRA1</i>                                              | 1.46                            |
| <i>HSP90AA1</i>                                    | 2.35                            | <i>UVRAG</i>                                               | 1.46                            |
| <i>BID</i>                                         | 2.32                            | <i>MAPK14</i>                                              | 1.46                            |
| <i>ATG4B</i>                                       | 2.25                            | <i>CTSB</i>                                                | 1.45                            |
| <i>HSPA8</i>                                       | 2.09                            | <i>GAA</i>                                                 | 1.44                            |
| <i>IGF1</i>                                        | 2.06                            | <i>BCL2L1</i>                                              | 1.43                            |
| <i>EIF4G1</i>                                      | 2.04                            | <i>RPS6KB1</i>                                             | 1.42                            |
| <i>ATG12</i>                                       | 1.99                            | <i>TGFB1</i>                                               | 1.42                            |
| <i>CASP8</i>                                       | 1.98                            | <i>NPC1</i>                                                | 1.41                            |
| <i>ATG5</i>                                        | 1.94                            | <i>CASP8</i>                                               | 1.41                            |

|                  |       |                  |      |
|------------------|-------|------------------|------|
| <i>EIF2AK3</i>   | 1.87  | <i>IRGM</i>      | 1.41 |
| <i>AMBRA1</i>    | 1.87  | <i>LAMP1</i>     | 1.40 |
| <i>BCL2L1</i>    | 1.79  | <i>PIK3C3</i>    | 1.40 |
| <i>DRAM1</i>     | 1.70  | <i>ATG4C</i>     | 1.37 |
| <i>RPS6KB1</i>   | 1.65  | <i>PRKAA1</i>    | 1.37 |
| <i>GABARAPL1</i> | 1.63  | <i>HSP90AA1</i>  | 1.36 |
| <i>WIPI1</i>     | 1.62  | <i>HDAC1</i>     | 1.36 |
| <i>PRKAA1</i>    | 1.51  | <i>BECN1</i>     | 1.35 |
| <i>ATG16L1</i>   | 1.51  | <i>ATG4B</i>     | 1.34 |
| <i>ATG16L2</i>   | 1.50  | <i>ATG7</i>      | 1.34 |
| <i>PIK3C3</i>    | 1.49  | <i>MAP1LC3B</i>  | 1.34 |
| <i>CASP3</i>     | 1.49  | <i>PIK3CG</i>    | 1.33 |
| <i>PIK3CG</i>    | 1.41  | <i>PTEN</i>      | 1.33 |
| <i>FADD</i>      | 1.38  | <i>MTOR</i>      | 1.32 |
| <i>IRGM</i>      | 1.37  | <i>ATG16L1</i>   | 1.30 |
| <i>NPC1</i>      | 1.35  | <i>TP53</i>      | 1.29 |
| <i>ATG4D</i>     | 1.33  | <i>ATG9A</i>     | 1.29 |
| <i>HTT</i>       | 1.30  | <i>CLN3</i>      | 1.28 |
| <i>SQSTM1</i>    | 1.30  | <i>EIF2AK3</i>   | 1.26 |
| <i>ATG3</i>      | 1.28  | <i>FADD</i>      | 1.25 |
| <i>NFKB1</i>     | 1.22  | <i>ATG5</i>      | 1.25 |
| <i>ATG4C</i>     | 1.20  | <i>TNFSF10</i>   | 1.24 |
| <i>BECN1</i>     | 1.17  | <i>HGS</i>       | 1.22 |
| <i>DRAM2</i>     | 1.14  | <i>WIPI1</i>     | 1.21 |
| <i>GAA</i>       | 1.14  | <i>GABARAPL2</i> | 1.20 |
| <i>ATG4A</i>     | 1.14  | <i>CASP3</i>     | 1.20 |
| <i>BAD</i>       | 1.10  | <i>ATG12</i>     | 1.19 |
| <i>CXCR4</i>     | 1.09  | <i>ATG4A</i>     | 1.18 |
| <i>TP53</i>      | 1.08  | <i>ULK1</i>      | 1.16 |
| <i>UVRAG</i>     | 1.08  | <i>HDAC6</i>     | 1.14 |
| <i>HDAC1</i>     | 1.07  | <i>BID</i>       | 1.13 |
| <i>RB1</i>       | 1.06  | <i>RB1</i>       | 1.12 |
| <i>HDAC6</i>     | 1.01  | <i>MAPK8</i>     | 1.07 |
| <i>BAX</i>       | -1.02 | <i>BCL2</i>      | 1.07 |
| <i>LAMP1</i>     | -1.03 | <i>AKT1</i>      | 1.06 |
| <i>ULK1</i>      | -1.08 | <i>CXCR4</i>     | 1.06 |
| <i>CLN3</i>      | -1.08 | <i>BAX</i>       | 1.05 |
| <i>CTSD</i>      | -1.14 | <i>DRAM2</i>     | 1.05 |
| <i>ATG9A</i>     | -1.15 | <i>ATG3</i>      | 1.05 |
| <i>TNFSF10</i>   | -1.21 | <i>BAD</i>       | 1.02 |
| <i>GABARAP</i>   | -1.26 | <i>RGS19</i>     | 1.01 |

|               |       |                |       |
|---------------|-------|----------------|-------|
| <i>CDKN1B</i> | -1.33 | <i>ATG4D</i>   | -1.02 |
| <i>BCL2</i>   | -1.35 | <i>CDKN1B</i>  | -1.02 |
| <i>TGFB1</i>  | -1.35 | <i>GABARAP</i> | -1.03 |
| <i>HGS</i>    | -1.36 | <i>TNF</i>     | -1.42 |
| <i>RGS19</i>  | -1.38 | <i>CDKN2A</i>  | -1.46 |
| <i>TNF</i>    | -1.42 | <i>FAS</i>     | -3.32 |

**Table S1. List of differential gene expression for all genes analyzed by the oligonucleotide array.** The fold up- and down- regulation is indicated for MOLM-13 SORE6<sup>+</sup> compared to SORE6<sup>-</sup> cells, with and without Ara-C treatment.
